# Supplementary material for: Impact of 2008 global economic crisis on suicide: time trend study in 54 countries
Source: HighWire-hosted journal article supplement (doi:10.1136/bmj.f5239), 2013-09-17

## Appendix 2 [posted as supplied by author]

Age-standardised suicide rates for males (dots) and females (circles) in 2000-2009, as well as pre-crisis trends (lines) estimated using negative binomial regression models based on data for 2000-2007.

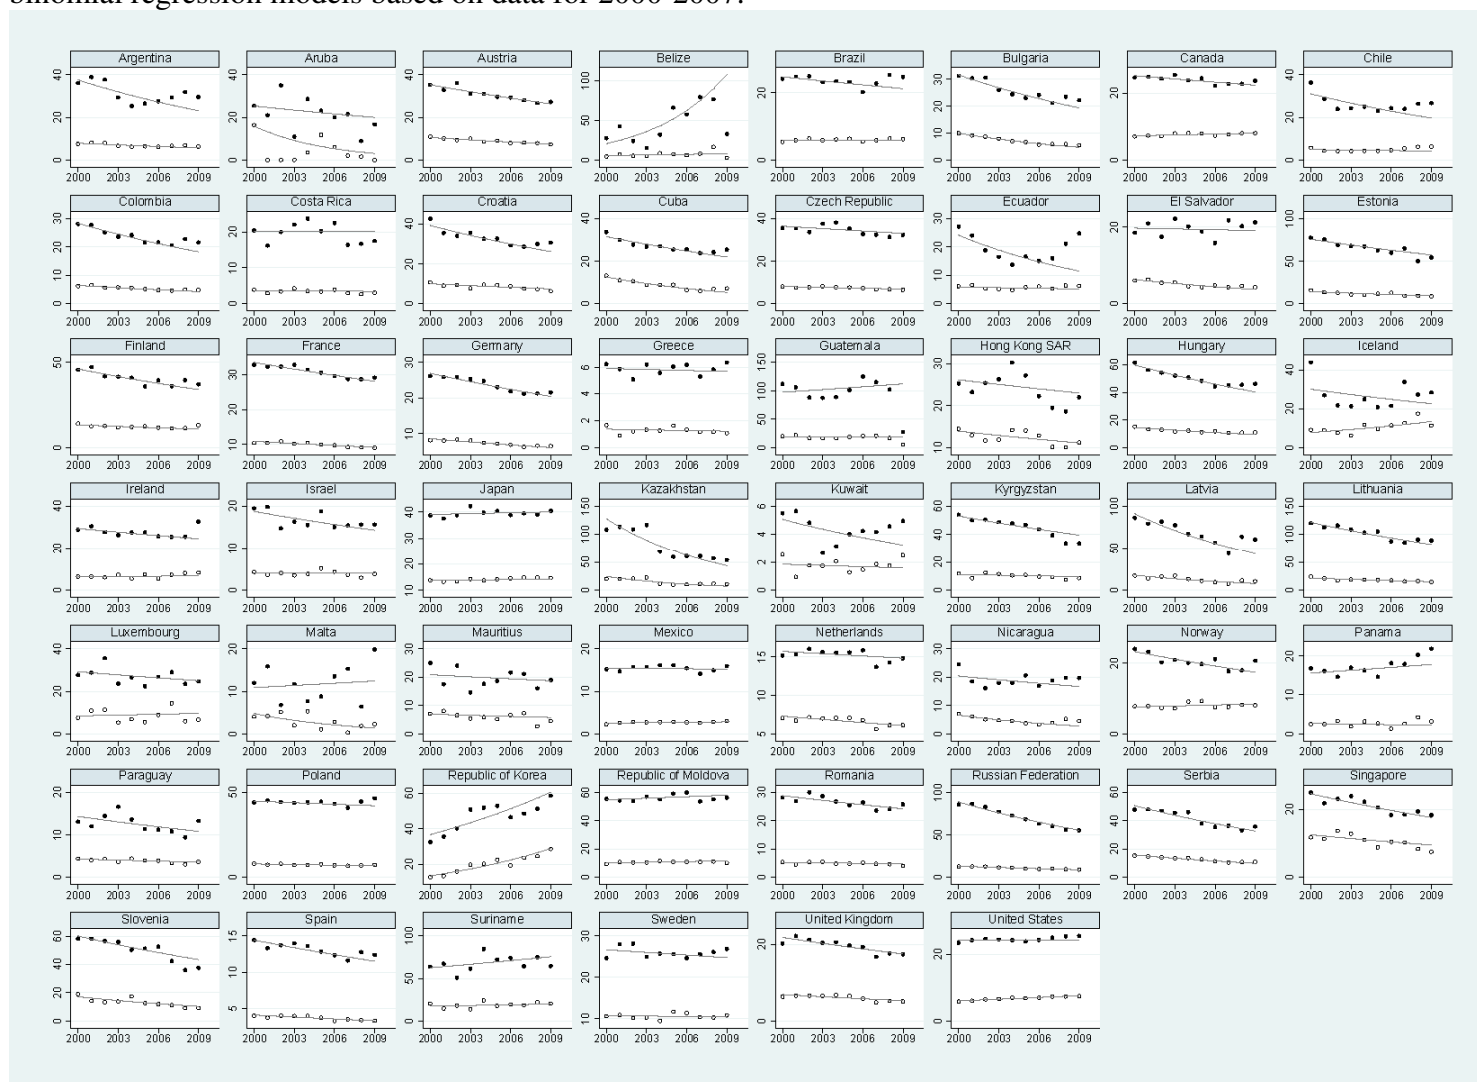

Supplement: chas011692.ww2_default.pdf [file chas011692.ww2_default.pdf]
